# Supplementary material for: Hydrothermal conversion of macroalgae-derived alginate to lactic acid catalyzed by metal oxides
Source: Royal Society of Chemistry journal article supplement (doi:10.1039/c5cy00966a), 2015-09-16
Supplement: c5cy00966a1.pdf [file c5cy00966a1.pdf]

## Supporting Information

### **Hydrothermal conversion of macroalgae-derived alginate to lactic acid catalysed by metal oxides**

Wonjin Jeon<sup>a</sup>, Chunghyeon Ban<sup>a</sup>, Geonu Park<sup>a</sup>, Hee Chul Woo<sup>b</sup> and Do Heui Kim<sup>a,\*</sup>

*<sup>a</sup>School of Chemical and Biological Engineering, Institute of Chemical Processes, Seoul  
National University, Seoul, 151-744, Republic of Korea*

*<sup>b</sup>Department of Chemical Engineering, Pukyong National University, Busan, 608-739,  
Republic of Korea*

\* Corresponding author: [dohkim@snu.ac.kr](mailto:dohkim@snu.ac.kr) (D. H. Kim)

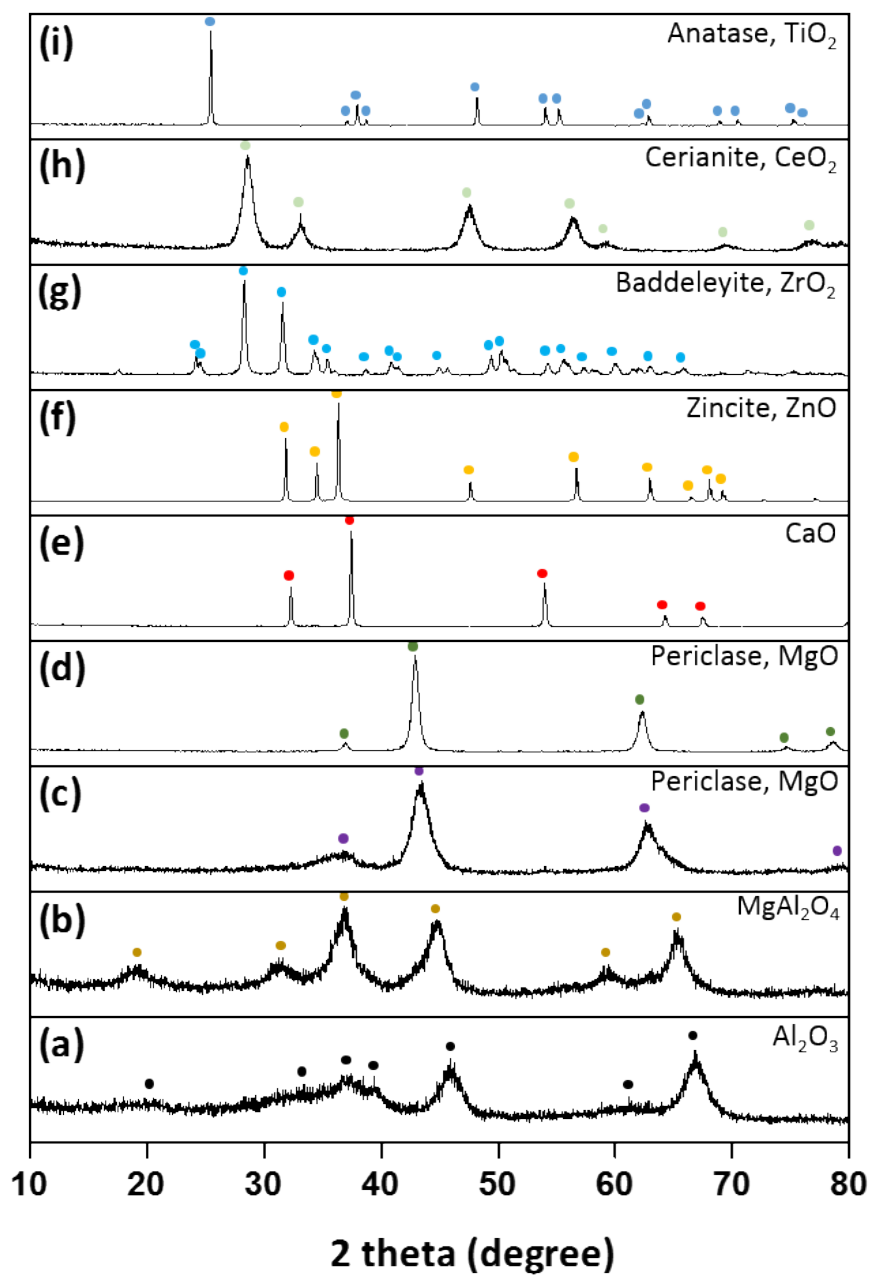

**Fig. S1.** X-ray diffraction patterns of prepared metal oxide catalysts: (a)  $\text{Al}_2\text{O}_3$ , (b)  $\text{Mg}_{30}\text{Al}_{70}$ , (c) hydrotalcite, (d)  $\text{MgO}$ , (e)  $\text{CaO}$ , (f)  $\text{ZnO}$ , (g)  $\text{ZrO}_2$ , (h)  $\text{CeO}_2$ , (i)  $\text{TiO}_2$ .

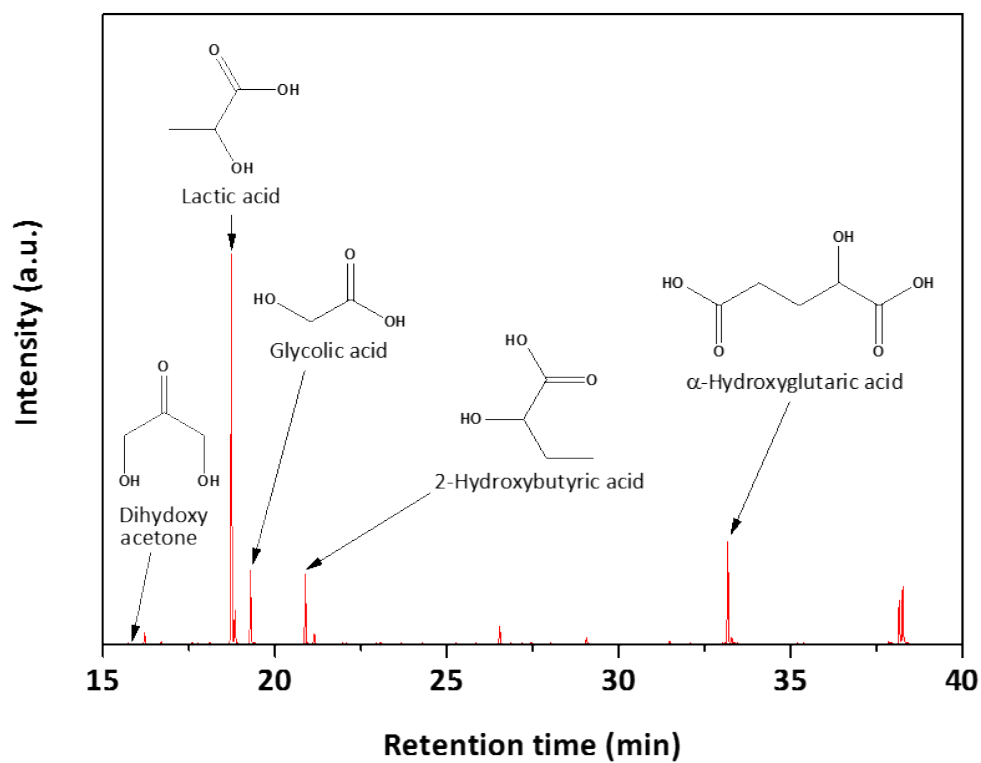

**Fig. S2.** GC-MS chromatogram of a TMS-silylated sample obtained by hydrothermal treatment of alginate over CaO at 200 °C for 1 h.

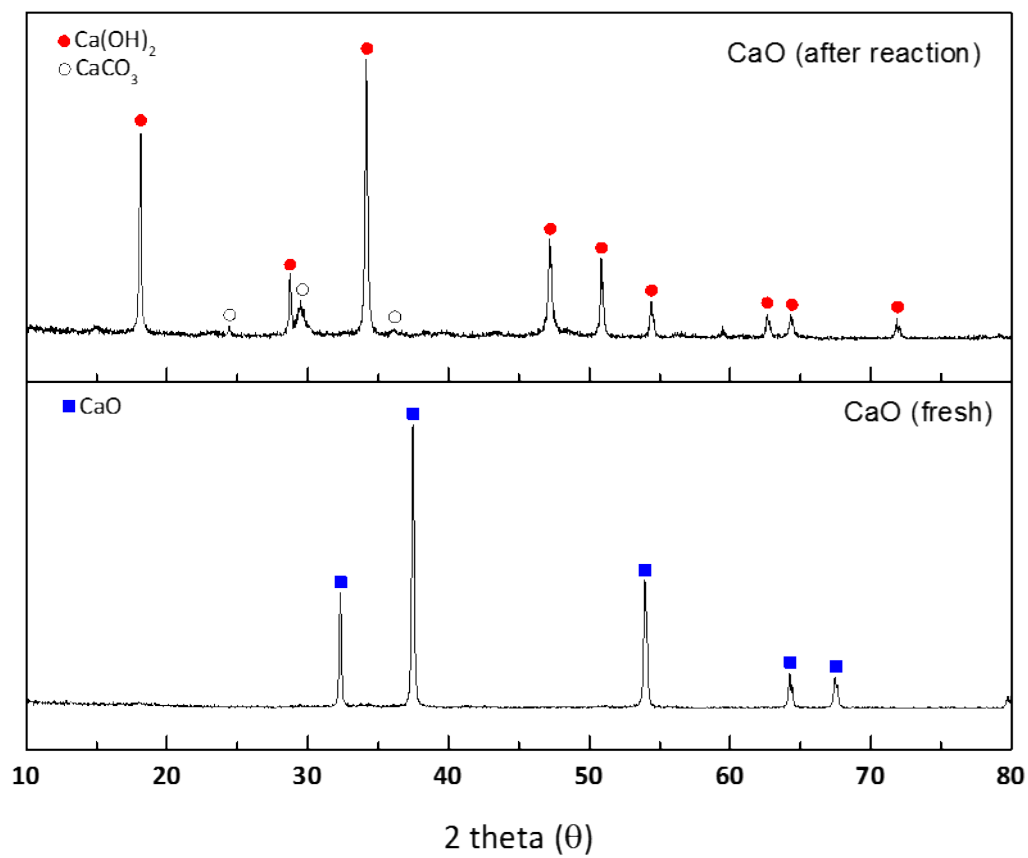

**Fig. S3.** XRD patterns of fresh and used catalysts.

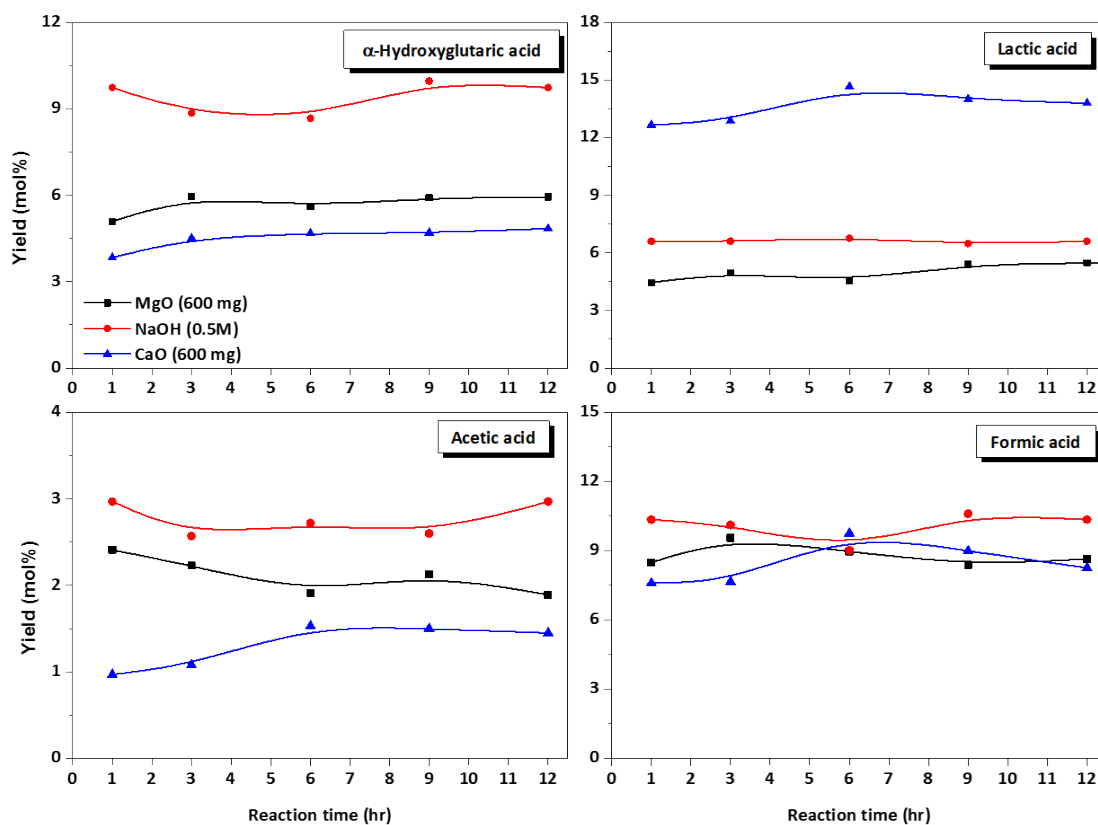

**Fig. S4.** Comparison of catalytic activity between heterogeneous and homogeneous base catalysts by reaction times. Reaction conditions: sodium alginate=600 mg, solvent (water)=30 mL, reaction temperature=200 °C, stirring speed=600 rpm.

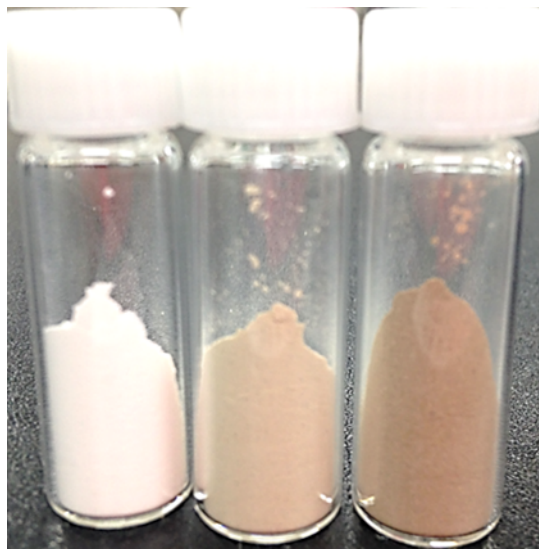

**Fig. S5.** Color variation of CaO catalyst by repeated hydrothermal reactions. Fresh CaO (left), used CaO (middle), deactivated CaO (right).

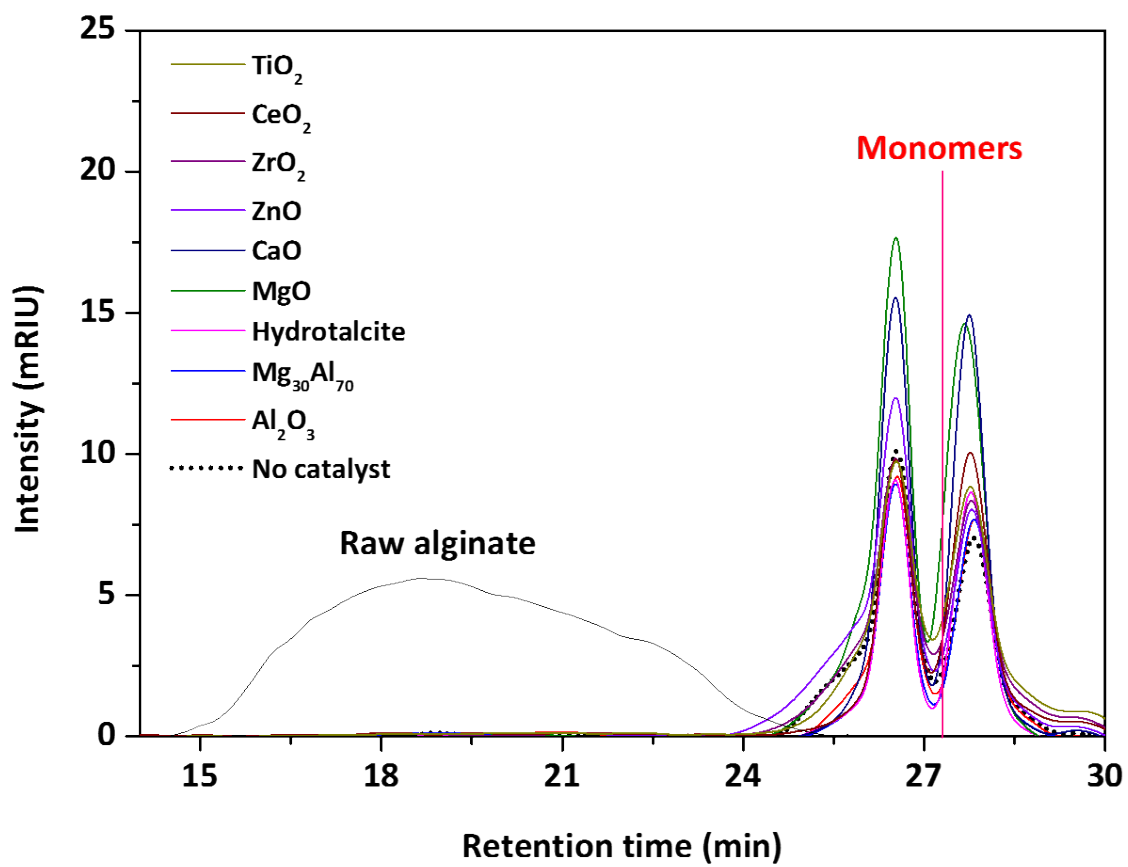

**Fig. S6.** GPC chromatograms of raw alginate and hydrothermally treated alginate over various solid base catalysts at 200 °C for 1 h.

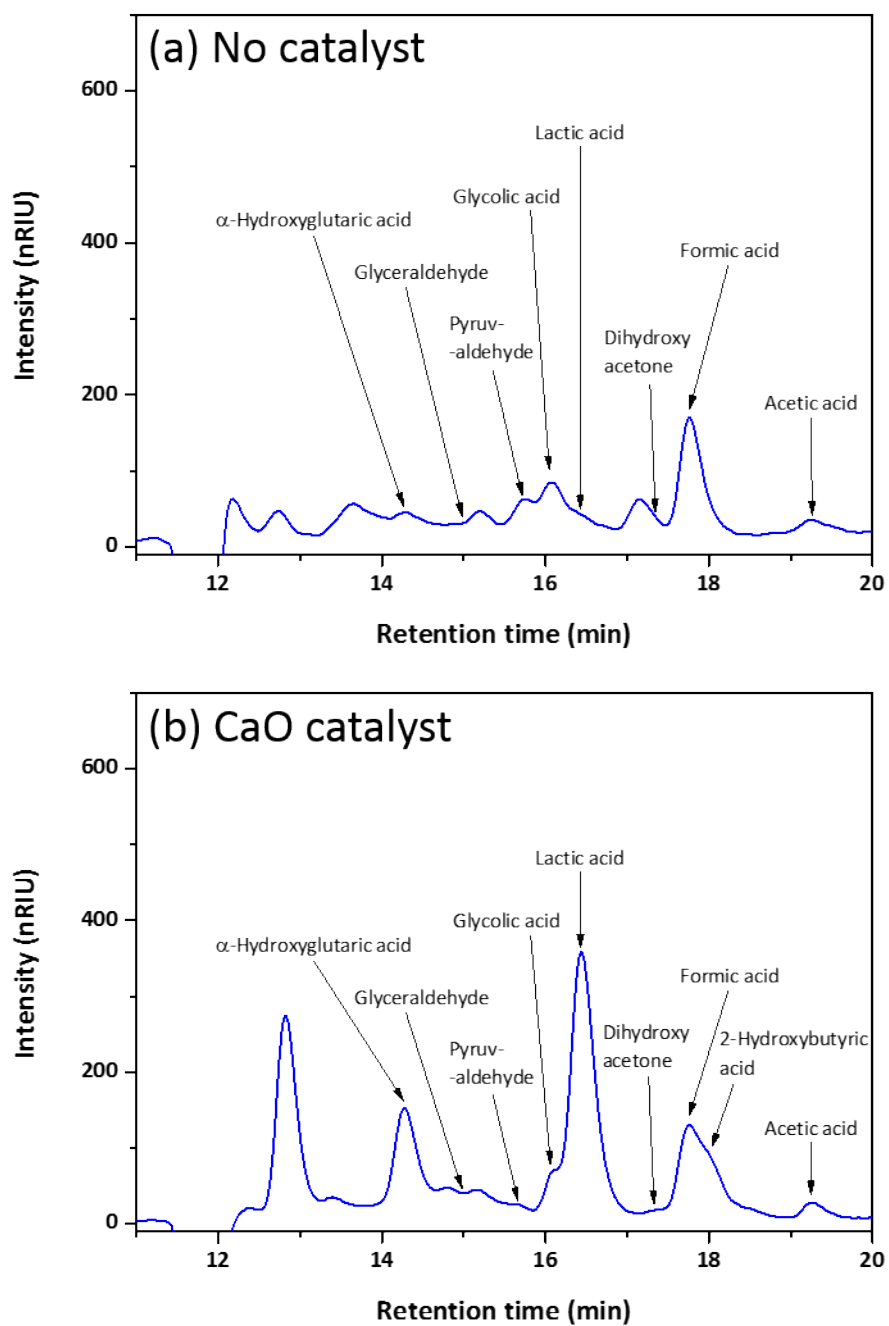

**Fig. S7.** HPLC-RID chromatogram for hydrothermal decomposition of alginate at 200 °C for 1 h. (a) Reaction without catalyst; (b) Reaction over CaO catalyst (600 mg).
